# Supplementary material for: Evidence for a Unique DNA-Dependent RNA Polymerase in Cereal Crops
Source: PubMed Central journal article supplement — Mol Biol Evol. 2018 Jul 24;35(10):2454–62. doi: 10.1093/molbev/msy146 (PMC6188566; doi:10.1093/molbev/msy146), 2018-07-24
Supplement: msy146_supp.pdf [file msy146_supp.pdf]

*Zea mays ssp. mays* – B73

NRPE1

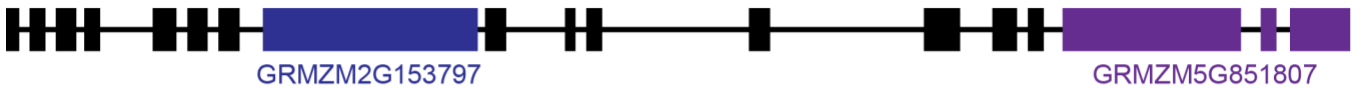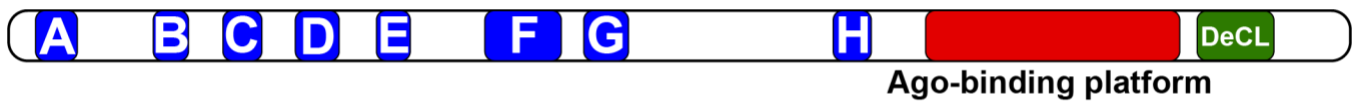

NRPF1

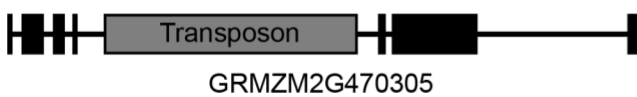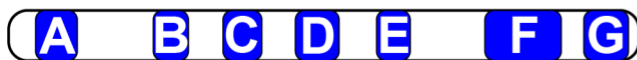

*Zea mays ssp. parviglumis* – teosinte

NRPE1

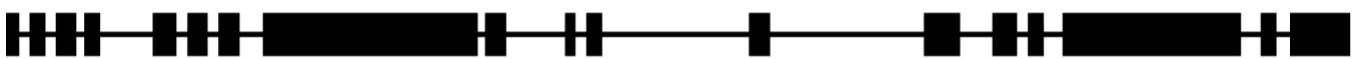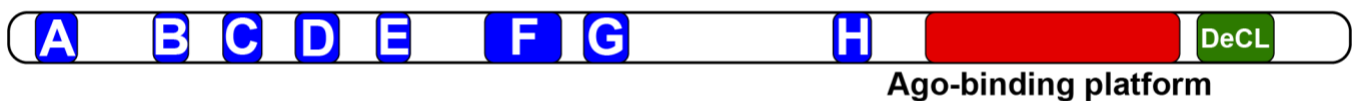

NRPF1

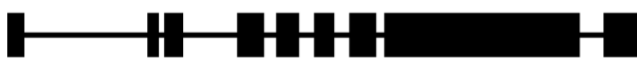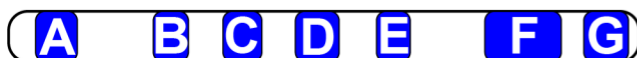

**Supplemental Figure 1. Pseudogenization of *Zea mays* NRPF1 locus.** Domesticated *Zea mays ssp mays* and its wild progenitor *Z. mays ssp parviglumis* (teosinte) both possess a full length NRPE1 paralog but lack an intact NRPF1 coding sequence. In *Z. mays ssp mays* variety B73, NRPE1 has been misannotated as two independent genes, shown in dark blue and purple. The coding region of NRPF1 is truncated shortly after the G domain and contains a transposable element in intron 4. The teosinte NRPF1 is also truncated after the G domain, but lacks the transposable element found within the *Z. mays ssp mays* locus.

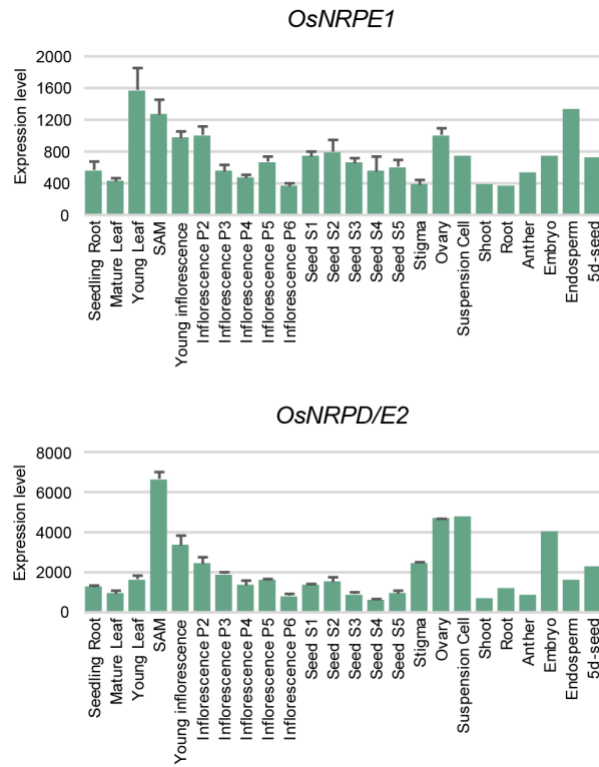

**Supplemental Figure 2. Pol V subunit paralogs are expressed in rice.** Expression analysis from BAR Rice eFP (<http://bar.utoronto.ca/efprice/cgi-bin/efpWeb.cgi>) for rice *NRPE1*, *NRPF1*, *NRPD/E2*, and *NRPF2*.



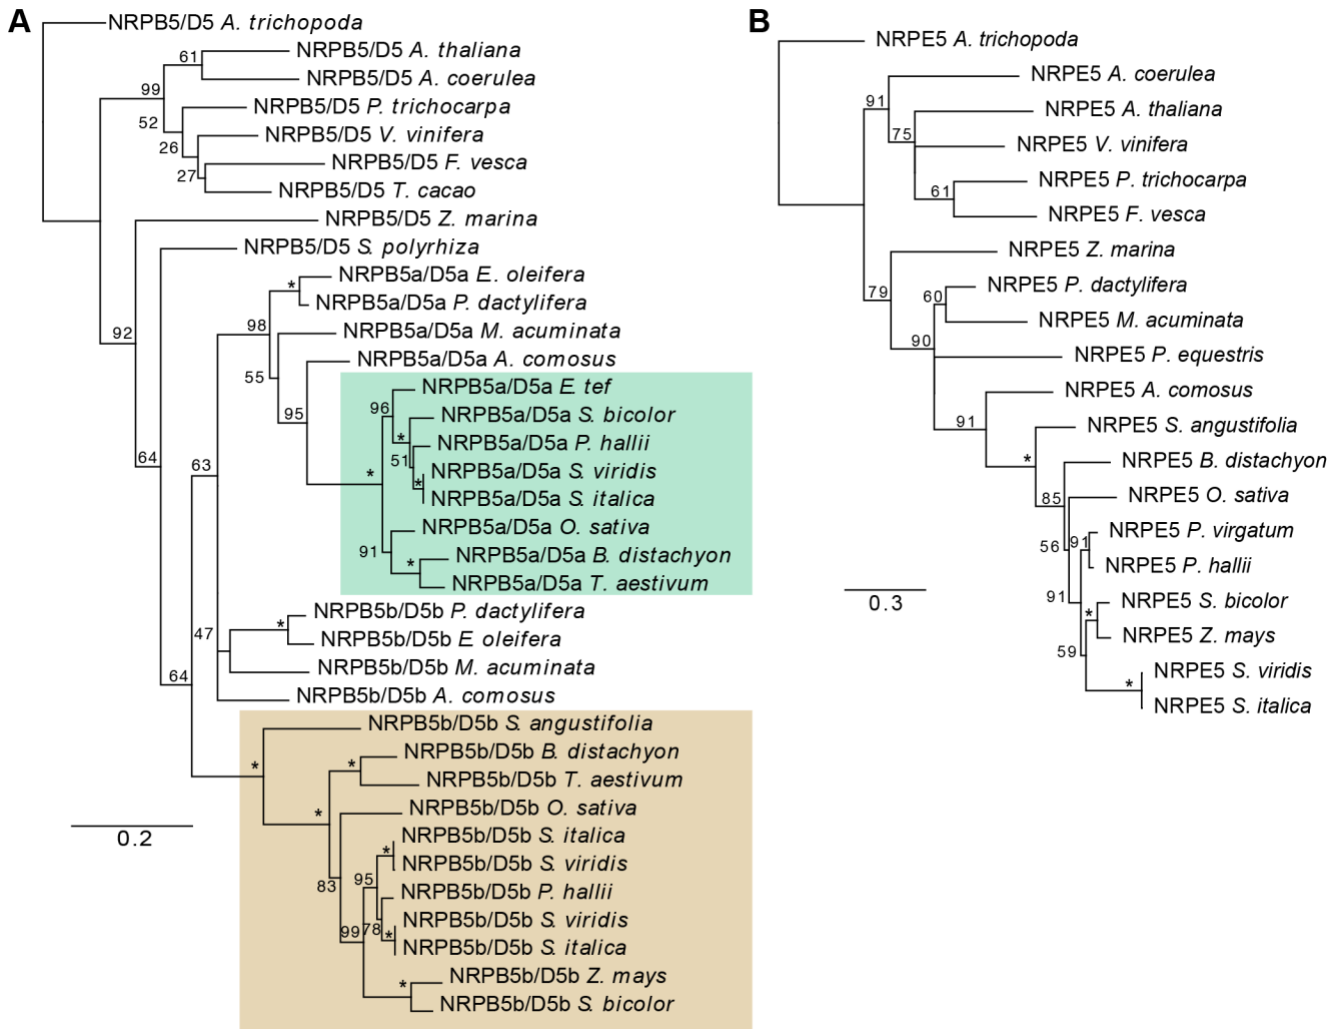

### Supplementary Figure 4. Duplication of *NRPB5/D5*, but not *NRPE5*.

(A) A maximum likelihood phylogenetic tree of *NRPB5/D5* shows a duplication event early in monocot evolution. The exact placement of this duplication is unclear, but there are two highly supported clades (100% bootstrap support, colored green and brown) of Poaceae sequences, suggesting retention of multiple paralogs throughout the grass family. (B) The *NRPE5* maximum likelihood phylogenetic tree closely mirrors the species tree, indicating there has not been a duplication of the Pol V fifth subunit. Branches with 100% bootstrap support are marked with an asterisk. Lineage-specific duplications were collapsed into a single terminal branch.



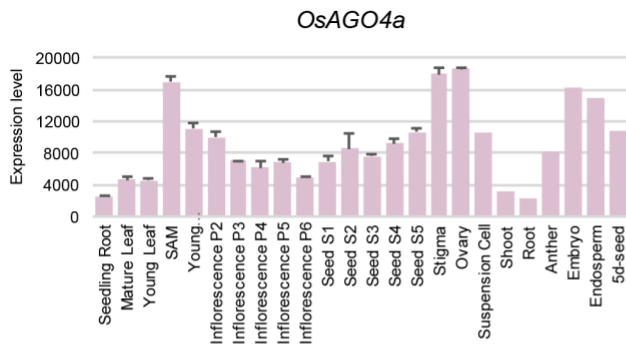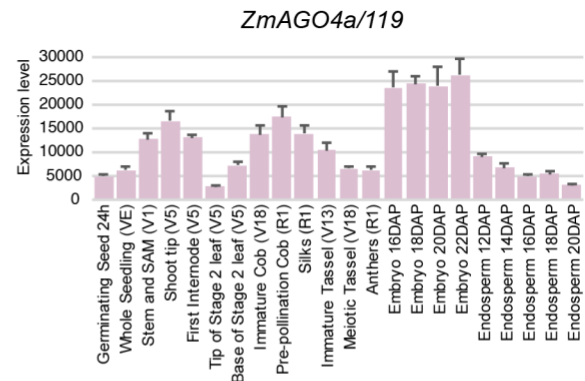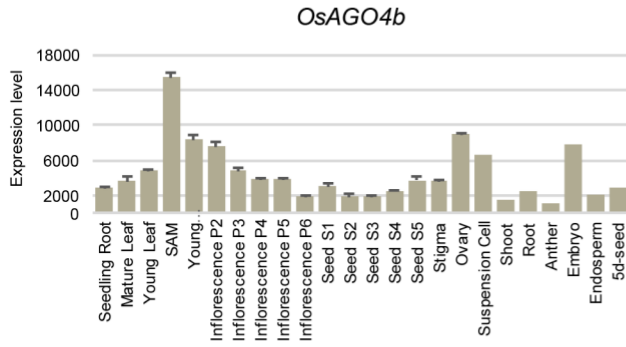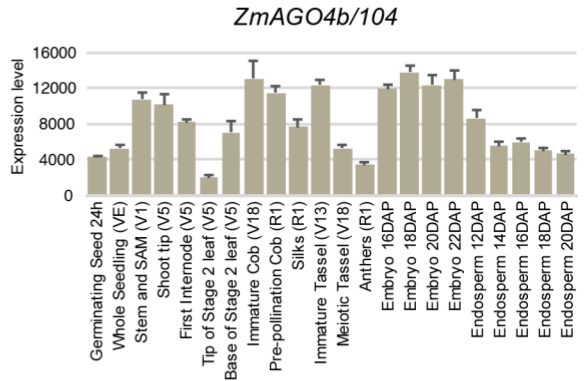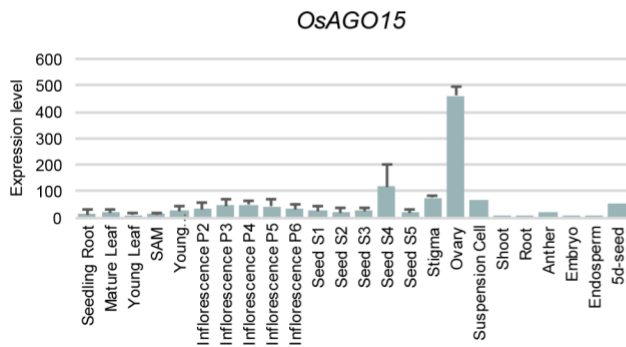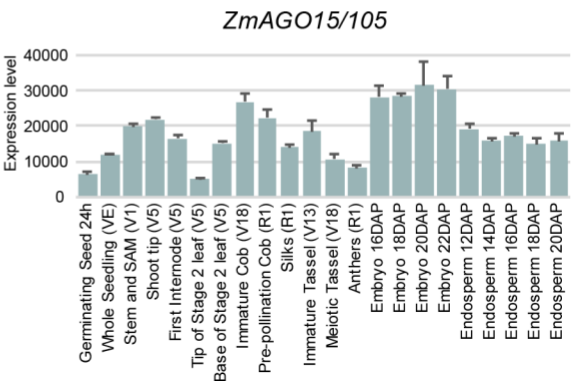

**Supplemental Figure 6. Expression patterns of AGO4 paralogs in rice and maize.** BAR Rice eFP (<http://bar.utoronto.ca/efprice/cgi-bin/efpWeb.cgi>) and maize eFP ([http://bar.utoronto.ca/efp\\_maize/cgi-bin/efpWeb.cgi](http://bar.utoronto.ca/efp_maize/cgi-bin/efpWeb.cgi)) expression data demonstrate that *OsAGO4a* and *OsAGO4b* are expressed throughout rice development. *OsAGO15* might be more narrowly expressed, however we were unable to detect transcripts using RT-PCR in floral tissue. *ZmAGO4a/119*, *ZmAGO4b/104*, and *ZmAGO15/105* are widely expressed.

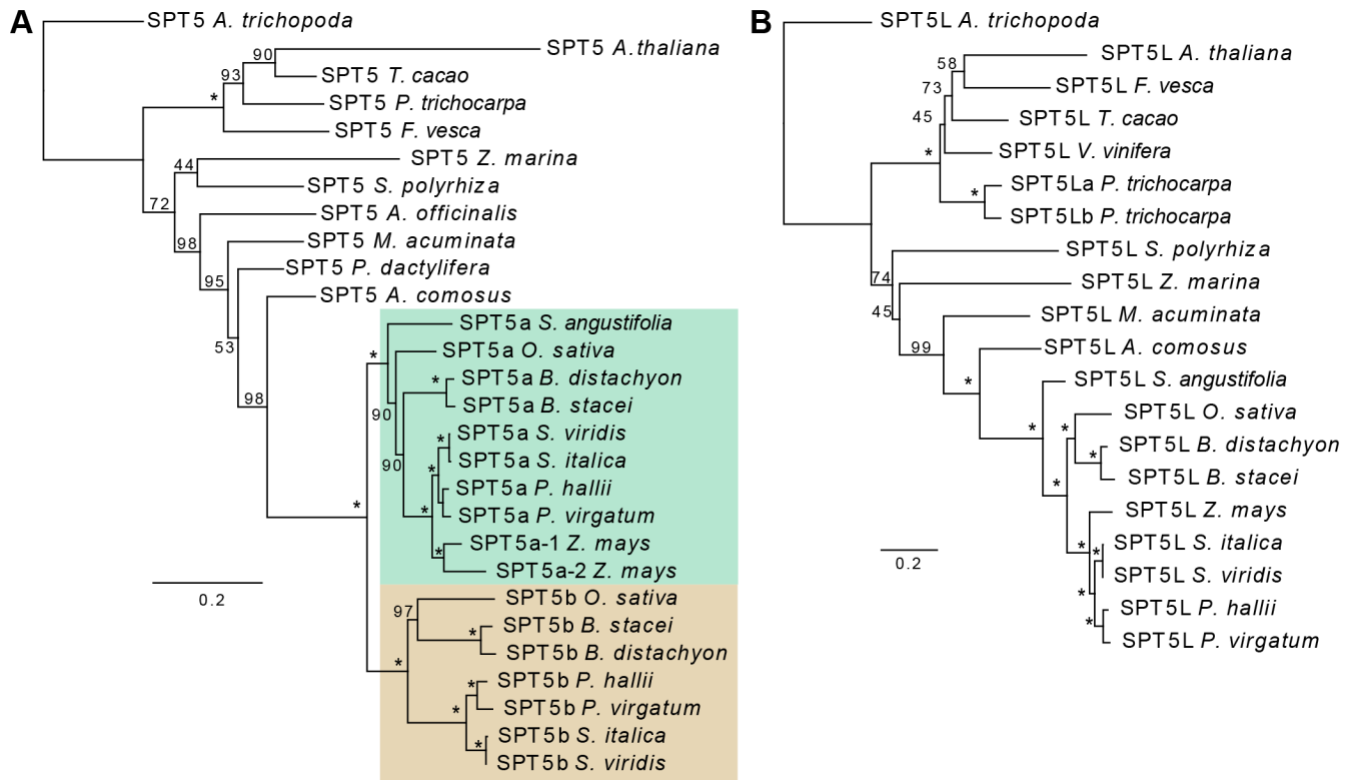

**Supplemental Figure 7. *SPT5*, but not *SPT5L*, transcription elongation factors are duplicated in grasses.**

Maximum likelihood phylogenetic trees of the conserved domains in *SPT5* (A) and *SPT5L* (B) families demonstrate that *SPT5* duplicated at the divergence of Poaceae. The paralogous clades are highlighted in green and brown. *SPT5L*, the paralog associated with Pol V in Arabidopsis, does not show a similar duplication. Branches with 100% bootstrap support are marked with an asterisk. Lineage-specific duplications were collapsed into a single terminal branch.

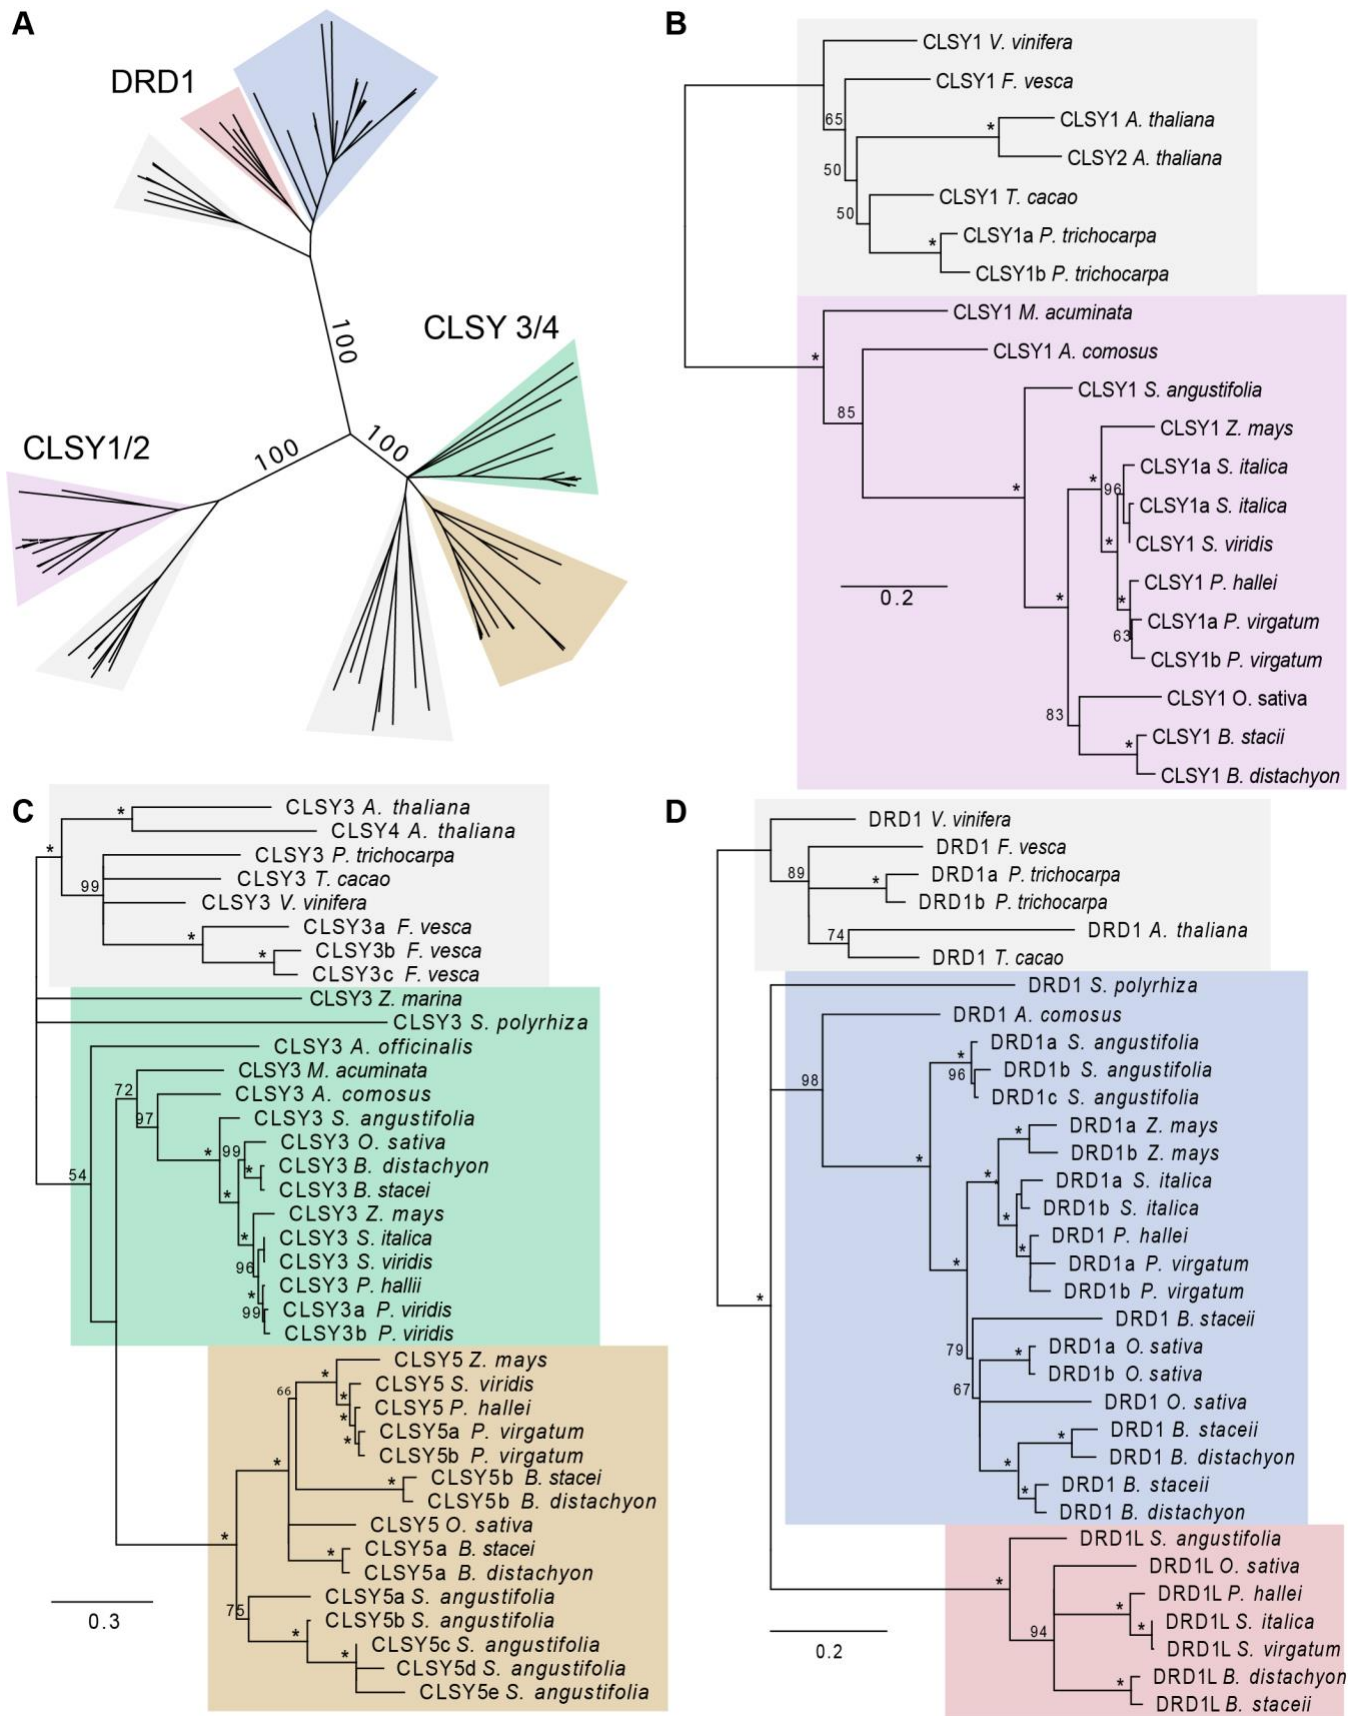

**Supplemental Figure 8. DRD1 and CLSY3/4-type SWI/SNF nucleosome remodeling proteins are duplicated in grasses.**



We assessed orthologs of the DRD1-type (including *DRD1*, *CLSY1/2*, and *CLSY3/4* clades) SWI/SNF nucleosome remodeling proteins and discovered duplications of *CLSY3/4* and *DRD1* in grasses. SWI/SNF proteins were recovered from monocot and selected dicot genomes from Phytozome. Reciprocal BLAST and phylogenetic trees were used to classify these proteins and eliminate non-DRD1-type SWI/SNF proteins. (A) An unrooted neighbor-joining tree of selected peptide sequences demonstrates that all sequences are unambiguously assigned to one of three subgroups. Support values from 100 bootstrap replicates. (B-D) Coding sequences were recovered and used to build maximum likelihood phylogenetic trees of the conserved helicase domains of each SWI/SNF subclass. Branches with support values <50 were collapsed and branches with 100% support are marked with an asterisk. The *CLSY1/2* tree (B) recapitulates the expected topology with a few lineage-specific duplications. The *CLSY3/4* (C) and *DRD1* (D) trees identify deeper duplications in the monocot grouping. For both trees placement of the duplication is somewhat unresolved, probably due to errors in annotation, however the additional paralogs (*CLSY5* or *DRD1L*) are only recovered in grass species, suggesting these duplications occurred at the divergence of Poaceae.

**Supplemental Table 1. List of gene sequences used in this study**

| <b>Gene</b> | <b>Species</b>         | <b>Gene ID</b>                                          |
|-------------|------------------------|---------------------------------------------------------|
| NRPE1       | <i>A. comosus</i>      | Aco023234                                               |
| NRPE1       | <i>A. tauschii</i>     | F775_02057                                              |
| NRPE1       | <i>A. officinalis</i>  | evm.model.AsparagusV1_06.200                            |
| NRPE1       | <i>B. distachyon</i>   | Bradi4g45065                                            |
| NRPE1       | <i>B. stacei</i>       | Brast05G298800                                          |
| NRPE1       | <i>E. oleifera</i>     | Unannotated, FGENESH predicted coding sequence          |
| NRPE1       | <i>E. tef</i>          | snap_masked-scaffold3807-abinit-gene-1.26-mRNA-1        |
| NRPE1       | <i>H. vulgare</i>      | MLOC_62016                                              |
| NRPE1       | <i>M. acuminata</i>    | GSMUA_Achr3T05690/ GSMUA_Achr3T05700/ GSMUA_Achr3T05710 |
| NRPE1       | <i>O. sativa</i>       | LOC_Os02g05880                                          |
| NRPE1       | <i>P. dactylifera</i>  | PDK_30s802521L005                                       |
| NRPE1       | <i>P. equestris</i>    | PEQU_19764 + PEQU_19766                                 |
| NRPE1       | <i>P. hallii</i>       | Pahal.A00310                                            |
| NRPE1       | <i>P. virgatum</i>     | Pavir.Ga01147                                           |
| NRPE1       | <i>S. angustifolia</i> | Unannotated, FGENESH predicted coding sequence          |
| NRPE1       | <i>S. bicolor</i>      | Sobic.004G043750                                        |
| NRPE1       | <i>S. italica</i>      | Seita.1G086100                                          |
| NRPE1       | <i>S. polyrhiza</i>    | Spipo2G0033800                                          |
| NRPE1       | <i>S. viridis</i>      | Sevir.7G147000                                          |
| NRPE1       | <i>T. aestivum</i>     | Traes_6DS_43BCD40B9                                     |
| NRPE1       | <i>Z. mays</i>         | GRMZM2G153797 + GRMZM5G851807                           |
| NRPE1       | <i>Z. marina</i>       | Zosma75g00810                                           |
| <b>Gene</b> | <b>Species</b>         | <b>Gene ID</b>                                          |
| NRPF1       | <i>A. tauschii</i>     | F775_23577                                              |
| NRPF1       | <i>B. distachyon</i>   | Bradi2g61683                                            |
| NRPF1       | <i>B. stacei</i>       | Brast01G012100                                          |
| NRPF1       | <i>E. tef</i>          | snap_masked-scaffold3548-abinit-gene-3.18-mRNA-1        |
| NRPF1       | <i>H. vulgare</i>      | MLOC_54009                                              |
| NRPF1       | <i>O. sativa</i>       | LOC_Os01g73430                                          |
| NRPF1       | <i>P. hallii</i>       | Pahal.I03212                                            |
| NRPF1       | <i>P. virgatum</i>     | Pavir.Aa03252                                           |
| NRPF1       | <i>S. angustifolia</i> | Unannotated, FGENESH predicted coding sequence          |
| NRPF1       | <i>S. bicolor</i>      | Sobic.003G439200                                        |
| NRPF1       | <i>S. italica</i>      | Seita.7G138600                                          |
| NRPF1       | <i>S. viridis</i>      | Sevir.1G084000                                          |
| NRPF1       | <i>T. aestivum</i>     | Traes_3AL_E77A5F03A                                     |
| NRPF1       | <i>Z. mays</i>         | GRMZM2G470305                                           |
| <b>Gene</b> | <b>Species</b>         | <b>Gene ID</b>                                          |
| NRPD/E2     | <i>A. comosus</i>      | Aco009438                                               |
| NRPD/E2     | <i>A. tauschii</i>     | F775_01648                                              |
| NRPD/E2     | <i>A. officinllis</i>  | evm.model.AsparagusV1_03.117                            |
| NRPD/E2     | <i>B. distachyon</i>   | Bradi5g23540                                            |
| NRPD/E2     | <i>B. stacei</i>       | Brast09G228900                                          |
| NRPD/E2     | <i>E. oleifera</i>     | Unannotated, FGENESH predicted coding sequence          |
| NRPD/E2     | <i>E. tef</i>          | maker-scaffold4272-snap-gene-0.34-mRNA-1                |
| NRPD/E2     | <i>H. vulgare</i>      | HORVU2Hr1G115600                                        |
| NRPD/E2     | <i>M. acuminata</i>    | GSMUA_Achr8T17010_001                                   |
| NRPD/E2     | <i>O. sativa</i>       | LOC_Os04g54840                                          |
| NRPD/E2     | <i>P. dactylifera</i>  | PDK_30s897181L002                                       |
| NRPD/E2     | <i>P. equestris</i>    | PEQU_35605                                              |
| NRPD/E2     | <i>P. hallii</i>       | Pahal.G02501                                            |
| NRPD/E2     | <i>P. virgatum</i>     | Pavir.Gb00384                                           |
| NRPD/E2     | <i>S. angustifolia</i> | Unannotated, FGENESH predicted coding sequence          |
| NRPD/E2     | <i>S. bicolor</i>      | Sobic.001G448100                                        |

|         |                     |                     |
|---------|---------------------|---------------------|
| NRPD/E2 | <i>S. italica</i>   | Seita.7G258200      |
| NRPD/E2 | <i>S. polyrhiza</i> | Spipo15G0003500     |
| NRPD/E2 | <i>S. viridis</i>   | Sevir.7G269600      |
| NRPD/E2 | <i>T. aestivum</i>  | Traes_2DL_4FD242B37 |
| NRPD/E2 | <i>Z. mays</i>      | GRMZM2G054225_T01   |
| NRPD/E2 | <i>Z. marina</i>    | Zosma248g00150      |

| Gene  | Species              | Gene ID                                   |
|-------|----------------------|-------------------------------------------|
| NRPF2 | <i>A. tauschii</i>   | F775_00990                                |
| NRPF2 | <i>B. distachyon</i> | Bradi3g15852                              |
| NRPF2 | <i>B. stacei</i>     | Brast03G026500                            |
| NRPF2 | <i>E. tef</i>        | maker-scaffold17955-snap-gene-0.28-mRNA-1 |
| NRPF2 | <i>H. vulgare</i>    | HORVU7Hr1G076850                          |
| NRPF2 | <i>O. sativa</i>     | LOC_Os08g07480                            |
| NRPF2 | <i>P. hallii</i>     | Pahal.F01121                              |
| NRPF2 | <i>P. virgatum</i>   | Pavir.Fb00476                             |
| NRPF2 | <i>S. bicolor</i>    | Sobic.007G056900                          |
| NRPF2 | <i>S. italica</i>    | Seita.6G047400                            |
| NRPF2 | <i>S. viridis</i>    | Sevir.6G044700                            |
| NRPF2 | <i>T. aestivum</i>   | Traes_7DL_222F95DC4                       |
| NRPF2 | <i>Z. mays</i>       | GRMZM2G133512_T01                         |

| Gene     | Species                | Gene ID                                      |
|----------|------------------------|----------------------------------------------|
| NRPB/D5  | <i>A. coerulea</i>     | Aqcoe7G260800                                |
| NRPB/D5a | <i>A. comosus</i>      | Aco018959                                    |
| NRPB/D5b | <i>A. comosus</i>      | Aco024268                                    |
| NRPB/D5  | <i>A. thaliana</i>     | AT3G22320                                    |
| NRPB/D5  | <i>A. trichopoda</i>   | evm_27.model.AmTr_v1.0_scaffold00068.11      |
| NRPB/D5a | <i>B. distachyon</i>   | Bradi2g52777                                 |
| NRPB/D5b | <i>B. distachyon</i>   | Bradi5g13967                                 |
| NRPB/D5a | <i>E. oleifera</i>     |                                              |
| NRPB/D5b | <i>E. oleifera</i>     |                                              |
| NRPB/D5  | <i>E. tef</i>          | maker-scaffold1292-augustus-gene-2.17-mRNA-1 |
| NRPB/D5  | <i>F. vesca</i>        | mrna05314.1-v1.0-hybrid                      |
| NRPB/D5a | <i>M. acuminata</i>    | GSMUA_AchrUn_randomT09620_001                |
| NRPB/D5b | <i>M. acuminata</i>    | GSMUA_Achr2T00920_001                        |
| NRPB/D5a | <i>O. sativa</i>       | LOC_Os01g59140                               |
| NRPB/D5b | <i>O. sativa</i>       | LOC_Os04g41040                               |
| NRPB/D5a | <i>P. dactylifera</i>  | cds10971                                     |
| NRPB/D5b | <i>P. dactylifera</i>  | cds22816                                     |
| NRPB/D5a | <i>P. hallii</i>       | Pahal.E01240                                 |
| NRPB/D5b | <i>P. hallii</i>       | Pahal.G00686                                 |
| NRPB/D5  | <i>P. trichocarpa</i>  | Potri.006G161600                             |
| NRPB/D5  | <i>S. angustifolia</i> | STRANG_00084297-RA                           |
| NRPB/D5a | <i>S. bicolor</i>      | Sobic.003G328700                             |
| NRPB/D5b | <i>S. bicolor</i>      | Sobic.006G127500                             |
| NRPB/D5a | <i>S. italica</i>      | Seita.5G352900                               |
| NRPB/D5b | <i>S. italica</i>      | Seita.7G144900                               |
| NRPB/D5c | <i>S. italica</i>      | Seita.5G051100                               |
| NRPB/D5  | <i>S. polyrhiza</i>    | Spipo0G0040300                               |
| NRPB/D5a | <i>S. viridis</i>      | Sevir.5G358000                               |
| NRPB/D5b | <i>S. viridis</i>      | Sevir.7G153500                               |
| NRPB/D5c | <i>S. viridis</i>      | Sevir.5G050500                               |
| NRPB/D5a | <i>T. aestivum</i>     | Traes_3B_37BBD6C41                           |
| NRPB/D5b | <i>T. aestivum</i>     | Traes_2BL_1FD85D348                          |
| NRPB/D5  | <i>T. cacao</i>        | Thecc1EG037836t1                             |
| NRPB/D5  | <i>V. vinifera</i>     | GSVIVT01015349001                            |
| NRPB/D5  | <i>Z. marina</i>       | Zosma440g00110                               |

NRPB/D5      *Z. mays*      GRMZM2G099183

| <b>Gene</b> | <b>Species</b>         | <b>Gene ID</b>                          |
|-------------|------------------------|-----------------------------------------|
| NRPE5       | <i>A. coerulea</i>     | Aqcoe2G036200                           |
| NRPE5       | <i>A. comosus</i>      | Aqcoe2G036200                           |
| NRPE5       | <i>A. thaliana</i>     | AT3G57080                               |
| NRPE5       | <i>A. trichopoda</i>   | evm_27.model.AmTr_v1.0_scaffold00116.10 |
| NRPE5       | <i>B. distachyon</i>   | Bradi4g26550                            |
| NRPE5       | <i>F. vesca</i>        | mrna21892.1-v1.0-hybrid                 |
| NRPE5       | <i>M. acuminata</i>    | GSMUA_Achr9T19340_001                   |
| NRPE5       | <i>O. sativa</i>       | LOC_Os12g04510                          |
| NRPE5       | <i>P. dactylifera</i>  | PDK_30s65509269L001                     |
| NRPE5       | <i>P. equestris</i>    | PEQU_23089                              |
| NRPE5       | <i>P. hallii</i>       | Pahal.H00047                            |
| NRPE5       | <i>P. trichocarpa</i>  | Potri.001G025500                        |
| NRPE5       | <i>P. virgatum</i>     | Pavir.Ha01857                           |
| NRPE5       | <i>S. angustifolia</i> | STRANG_00052800-RA                      |
| NRPE5       | <i>S. bicolor</i>      | Sobic.005G030600                        |
| NRPE5       | <i>S. italica</i>      | Seita.8G027200                          |
| NRPE5       | <i>S. viridis</i>      | Sevir.7G328000                          |
| NRPE5       | <i>V. vinifera</i>     | GSVIVT01033595001                       |
| NRPE5       | <i>Z. marina</i>       | Zosma192g00210                          |
| NRPE5       | <i>Z. mays</i>         | GRMZM2G162697                           |

| <b>Gene</b> | <b>Species</b>         | <b>Gene ID</b>                |
|-------------|------------------------|-------------------------------|
| NRPB/D/E9a  | <i>A. comosus</i>      | Aco001788                     |
| NRPB/D/E9b  | <i>A. comosus</i>      | Aco027798                     |
| NRPB/D/E9c  | <i>A. comosus</i>      | Aco009500                     |
| NRPB/D/E9   | <i>A. officinalis</i>  | evm.model.AsparagusV1_07.1236 |
| NRPB/D/E9a  | <i>B. distachyon</i>   | Bradi4g04820                  |
| NRPB/D/E9b  | <i>B. distachyon</i>   | Bradi1g78509                  |
| NRPB/D/E9c  | <i>B. distachyon</i>   | Bradi1g20820                  |
| NRPB/D/E9a  | <i>B. staceii</i>      | Brast10G053700                |
| NRPB/D/E9b  | <i>B. staceii</i>      | Brast02G002000                |
| NRPB/D/E9c  | <i>B. staceii</i>      | Brast06G047100                |
| NRPB/D/E9a  | <i>M. acuminata</i>    | GSMUA_Achr10G02200_001        |
| NRPB/D/E9b  | <i>M. acuminata</i>    | GSMUA_Achr7T05620_001         |
| NRPB/D/E9c  | <i>M. acuminata</i>    | GSMUA_Achr4G24050_001         |
| NRPB/D/E9a  | <i>O. sativa</i>       | LOC_Os12g37370                |
| NRPB/D/E9b  | <i>O. sativa</i>       | LOC_Os03g01230                |
| NRPB/D/E9c  | <i>O. sativa</i>       | LOC_Os07g42395                |
| NRPB/D/E9a  | <i>P. dactylifera</i>  | cds4303                       |
| NRPB/D/E9b  | <i>P. dactylifera</i>  | cds18947                      |
| NRPB/D/E9a  | <i>P. equestris</i>    | PEQU_29548                    |
| NRPB/D/E9b  | <i>P. equestris</i>    | PEQU_21523                    |
| NRPB/D/E9a  | <i>P. hallii</i>       | Pahal.I04586                  |
| NRPB/D/E9b  | <i>P. hallii</i>       | Pahal.G01696                  |
| NRPB/D/E9c  | <i>P. hallii</i>       | Pahal.B04703                  |
| NRPB/D/E9a  | <i>P. virgatum</i>     | Pavir.Ca02562                 |
| NRPB/D/E9b  | <i>P. virgatum</i>     | Pavir.J16609                  |
| NRPB/D/E9c  | <i>P. virgatum</i>     | Pavir.Ba00418                 |
| NRPB/D/E9a  | <i>S. angustifolia</i> | STRANG_00026340-RA            |
| NRPB/D/E9b  | <i>S. angustifolia</i> | STRANG_00027772-RA            |
| NRPB/D/E9c  | <i>S. angustifolia</i> | STRANG_00003454-RA            |
| NRPB/D/E9a  | <i>S. bicolor</i>      | Sobic.008G128900              |
| NRPB/D/E9b  | <i>S. bicolor</i>      | Sobic.009G165600              |
| NRPB/D/E9c  | <i>S. bicolor</i>      | Sobic.002G374200              |
| NRPB/D/E9a  | <i>S. italic</i>       | Seita.3G335700                |

|            |                     |                |
|------------|---------------------|----------------|
| NRPB/D/E9b | <i>S. italic</i>    | Seita.7G044300 |
| NRPB/D/E9c | <i>S. italic</i>    | Seita.2G388500 |
| NRPB/D/E9  | <i>S. polyrhiza</i> | Spipo2G0057100 |
| NRPB/D/E9a | <i>S. viridis</i>   | Sevir.3G350200 |
| NRPB/D/E9b | <i>S. viridis</i>   | Sevir.7G049300 |
| NRPB/D/E9c | <i>S. viridis</i>   | Sevir.2G399000 |
| NRPB/D/E9  | <i>Z. marina</i>    | Zosma25g01500  |
| NRPB/D/E9a | <i>Z. mays</i>      | GRMZM2G046061  |
| NRPB/D/E9b | <i>Z. mays</i>      | GRMZM2G023028  |
| NRPB/D/E9c | <i>Z. mays</i>      | GRMZM5G898768  |

| Gene      | Species                | Gene ID                                          |
|-----------|------------------------|--------------------------------------------------|
| AGO4      | <i>A. comosus</i>      | Aco017860                                        |
| AGO4a     | <i>A. tauschii</i>     | F775_27134                                       |
| AGO4b     | <i>A. tauschii</i>     | F775_27714                                       |
| AGO4      | <i>A. officinalis</i>  | evm.model.AsparagusV1_07.1132                    |
| AGO4a     | <i>B. distachyon</i>   | Bradi2g10370                                     |
| AGO4b     | <i>B. distachyon</i>   | Bradi2g14147                                     |
| AGO4a     | <i>B. stacei</i>       | Brast01G298200                                   |
| AGO4b     | <i>B. stacei</i>       | Brast08G001100                                   |
| AGO4      | <i>E. oleifera</i>     | Unannotated, FGENESH predicted coding sequence   |
| AGO4a     | <i>E. tef</i>          | maker-scaffold315-augustus-gene-0.27-mRNA-1      |
| AGO4b     | <i>E. tef</i>          | snap_masked-scaffold1886-abinit-gene-0.21-mRNA-1 |
| AGO4a     | <i>H. vulgare</i>      | HORVU3Hr1G038830                                 |
| AGO4b     | <i>H. vulgare</i>      | HORVU1Hr1G095300                                 |
| AGO4      | <i>M. acuminata</i>    | GSMUA_Achr9T05150                                |
| AGO4a     | <i>O. sativa</i>       | LOC_Os01g16870                                   |
| AGO4b     | <i>O. sativa</i>       | LOC_Os04g06770                                   |
| AGO4      | <i>P. dactylifera</i>  | cds36720                                         |
| AGO4      | <i>P. equestris</i>    | PEQU_18408                                       |
| AGO4a     | <i>P. hallii</i>       | Pahal.E03348                                     |
| AGO4b     | <i>P. hallii</i>       | Pahal.C01666                                     |
| AGO4a     | <i>P. virgatum</i>     | Pavir.Eb01138                                    |
| AGO4b     | <i>P. virgatum</i>     | Pavir.J00737                                     |
| AGO4a     | <i>S. angustifolia</i> | Unannotated, FGENESH predicted coding sequence   |
| AGO4b     | <i>S. angustifolia</i> | Unannotated, FGENESH predicted coding sequence   |
| AGO4a     | <i>S. bicolor</i>      | Sobic.003G129500                                 |
| AGO4b     | <i>S. bicolor</i>      | Sobic.009G259900                                 |
| AGO4a     | <i>S. italica</i>      | Seita.5G043300                                   |
| AGO4b     | <i>S. italica</i>      | Seita.3G117800                                   |
| AGO4      | <i>S. polyrhiza</i>    | Spipo3G0017600                                   |
| AGO4a     | <i>S. viridis</i>      | Sevir.5G040900                                   |
| AGO4b     | <i>S. viridis</i>      | Sevir.3G120100                                   |
| AGO4a     | <i>T. aestivum</i>     | TRIAE_CS42_3AS_TGACv1_211331_AA0688710           |
| AGO4b     | <i>T. aestivum</i>     | TRIAE_CS42_1DL_TGACv1_062840_AA0220790           |
| AGO4a/119 | <i>Z. mays</i>         | GRMZM2G589579                                    |
| AGO4b/104 | <i>Z. mays</i>         | GRMZM2G141818                                    |

| Gene  | Species              | Gene ID                                  |
|-------|----------------------|------------------------------------------|
| AGO15 | <i>A. tauschii</i>   | F775_02440                               |
| AGO15 | <i>B. distachyon</i> | Bradi2g10360                             |
| AGO15 | <i>B. stacei</i>     | Brast01G298300                           |
| AGO15 | <i>E. tef</i>        | maker-scaffold1490-snap-gene-1.50-mRNA-1 |
| AGO15 | <i>H. vulgare</i>    | HORVU7Hr1G107770                         |
| AGO15 | <i>O. sativa</i>     | LOC_Os01g16860                           |
| AGO15 | <i>P. hallii</i>     | Pahal.E03353                             |
| AGO15 | <i>P. virgatum</i>   | Pavir.Eb01136                            |
| AGO15 | <i>S. bicolor</i>    | Sobic.003G129200                         |

|           |                   |                                                |
|-----------|-------------------|------------------------------------------------|
| AGO15     | <i>S. italica</i> | Unannotated, FGENESH predicted coding sequence |
| AGO15     | <i>S. viridis</i> | Sevir.5G041600                                 |
| AGO15/105 | <i>Z. mays</i>    | GRMZM2G469673/GRMZM2G048335/GRMZM2G089743      |

| Gene  | Species                | Accession                                |
|-------|------------------------|------------------------------------------|
| SPT5  | <i>A. thaliana</i>     | AT2G34210                                |
| SPT5  | <i>A. trichopoda</i>   | evm_27.model.AmTr_v1.0_scaffold00002.351 |
| SPT5  | <i>A. comosus</i>      | Aco002639.1                              |
| SPT5  | <i>A. officinalis</i>  | evm.model.AsparagusV1_05.376             |
| SPT5a | <i>B. distachyon</i>   | Bradi1g46230.3.p                         |
| SPT5b | <i>B. distachyon</i>   | Bradi3g57590.2.p                         |
| SPT5a | <i>B. stacei</i>       | Brast07G070000.1                         |
| SPT5b | <i>B. stacei</i>       | Brast04G034700.1                         |
| SPT5  | <i>F. vesca</i>        | gene30070v1.0hybrid                      |
| SPT5  | <i>M. acuminata</i>    | GSMUA_Achr3P08080_001                    |
| SPT5a | <i>O. sativa</i>       | LOC_Os06g10620.1                         |
| SPT5b | <i>O. sativa</i>       | LOC_Os02g53230.1                         |
| SPT5a | <i>P. hallii</i>       | Pahal.D02854.1                           |
| SPT5b | <i>P. hallii</i>       | Pahal.G02677.1                           |
| SPT5  | <i>P. trichocarpa</i>  | Potri.009G124200.1                       |
| SPT5  | <i>P. dactylifera</i>  | LOC103718524                             |
| SPT5a | <i>P. virgatum</i>     | PavirDb02038.1                           |
| SPT5b | <i>P. virgatum</i>     | Pavir.Aa00338.1                          |
| SPT5a | <i>S. angustifolia</i> | STRANG 00000456RA                        |
| SPT5a | <i>S. italica</i>      | Seita.4G084400.1.p                       |
| SPT5b | <i>S. italica</i>      | Seita.1G335500.1                         |
| SPT5  | <i>S. polyrhiza</i>    | Spipo10G0038700                          |
| SPT5a | <i>S. viridis</i>      | Sevir.4G083700.1                         |
| SPT5b | <i>S. viridis</i>      | Sevir.1G342100.1                         |
| SPT5  | <i>T. cacao</i>        | Thecc1EG035426                           |
| SPT5  | <i>Z. marina</i>       | Zosma52g01330.1                          |
| SPT5a | <i>Z. mays</i>         | GRMZM2G142072_P01                        |
| SPT5a | <i>Z. mays</i>         | GRMZM2G171488_T02                        |

| Gene  | Species               | Accession                                |
|-------|-----------------------|------------------------------------------|
| SPT5L | <i>A. thaliana</i>    | AT5G04290.1                              |
| SPT5L | <i>A. trichopoda</i>  | evm_27.model.AmTr_v1.0_scaffold00002.356 |
| SPT5L | <i>A. comosus</i>     | Aco005272.1                              |
| SPT5L | <i>B. distachyon</i>  | Bradi2g20517.2                           |
| SPT5L | <i>B. stacei</i>      | Brast08G068300.2                         |
| SPT5L | <i>F. vesca</i>       | gene23431v1.0hybrid                      |
| SPT5L | <i>M. acuminata</i>   | GSMUA_Achr7P16990_001                    |
| SPT5L | <i>O. sativa</i>      | LOC_Os05g43060.1                         |
| SPT5L | <i>P. hallii</i>      | Pahal.C02415.2                           |
| SPT5L | <i>P. trichocarpa</i> | Potri.008G032800.1                       |
| SPT5L | <i>P. trichocarpa</i> | Potri.010G228800.1                       |
| SPT5L | <i>P. virgatum</i>    | Pavir.Ca01318                            |
| SPT5L | <i>S. italica</i>     | Seita.3G186400.1                         |
| SPT5L | <i>S. polyrhiza</i>   | Spipo3G0088300                           |
| SPT5L | <i>S. viridis</i>     | Sevir.3G191100.1                         |
| SPT5L | <i>T. cacao</i>       | Thecc1EG043328t1                         |
| SPT5L | <i>V. vinifera</i>    | GSVIVT01016203001                        |
| SPT5L | <i>Z. mays</i>        | GRMZM2G375222_P01                        |
| SPT5L | <i>Z. marina</i>      | Zosma159g00420.1                         |

| Gene  | Species            | Accession |
|-------|--------------------|-----------|
| CLSY1 | <i>A. comosus</i>  | Aco011099 |
| CLSY1 | <i>A. thaliana</i> | AT3G42670 |

| <b>Gene</b> | <b>Species</b>         | <b>Accession</b>      |
|-------------|------------------------|-----------------------|
| CLSY2       | <i>A. thaliana</i>     | AT5G20420             |
| CLSY1       | <i>B. distachyon</i>   | Bradi1g16720          |
| CLSY1       | <i>B. stacei</i>       | Brast06G002700        |
| CLSY1       | <i>F. vesca</i>        | gene21045-v1.0-hybrid |
| CLSY1       | <i>M. acuminata</i>    | GSMUA_Achr8G01860_001 |
| CLSY1       | <i>O. sativa</i>       | LOC_Os07g49210        |
| CLSY1       | <i>P. hallii</i>       | Pahal.J01776          |
| CLSY1a      | <i>P. trichocarpa</i>  | Potri.008G073500      |
| CLSY1b      | <i>P. trichocarpa</i>  | Potri.010G183800      |
| CLSY1a      | <i>P. virgatum</i>     | Pavir.Ba00302         |
| CLSY1b      | <i>P. virgatum</i>     | Pavir.Bb03632         |
| CLSY1       | <i>S. angustifolia</i> | STRANG_00023332-RA    |
| CLSY1a      | <i>S. italica</i>      | Seita.2G442300        |
| CLSY1b      | <i>S. italica</i>      | Seita.9G461000        |
| CLSY1       | <i>S. viridis</i>      | Sevir.2G454400        |
| CLSY1       | <i>T. cacao</i>        | Thecc1EG042431        |
| CLSY1       | <i>V. vinifera</i>     | GSVIVG01032746001     |
| CLSY1       | <i>Z. mays</i>         | GRMZM2G108166         |

| <b>Gene</b> | <b>Species</b>         | <b>Accession</b>              |
|-------------|------------------------|-------------------------------|
| CLSY3       | <i>A. comosus</i>      | LG08:12562121..12567155       |
| CLSY3       | <i>A. officinalis</i>  | evm.model.AsparagusV1_04.2656 |
| CLSY3       | <i>A. thaliana</i>     | AT1G05490                     |
| CLSY4       | <i>A. thaliana</i>     | AT3G24340                     |
| CLSY3       | <i>F. vesca</i>        | gene10657-v1.0-hybrid         |
| CLSY3       | <i>F. vesca</i>        | gene10658-v1.0-hybrid         |
| CLSY3       | <i>F. vesca</i>        | gene23334-v1.0-hybrid         |
| CLSY3       | <i>M. acuminata</i>    | GSMUA_Achr7G06840_001         |
| CLSY3       | <i>O. sativa</i>       | LOC_Os05g32610                |
| CLSY3       | <i>P. hallii</i>       | Pahal.F01921                  |
| CLSY3       | <i>P. trichocarpa</i>  | Potri.014G050200              |
| CLSY3a      | <i>P. virgatum</i>     | Pavir.J01490                  |
| CLSY3b      | <i>P. virgatum</i>     | Pavir.Cb01678                 |
| CLSY3       | <i>S. angustifolia</i> | STRANG_00015789-RA            |
| CLSY3       | <i>S. italica</i>      | Seita.3G254300                |
| CLSY3       | <i>S. viridis</i>      | Sevir.3G260900                |
| CLSY3       | <i>S. polyrhiza</i>    | Spipo5G0053000                |
| CLSY3       | <i>T. cacao</i>        | Thecc1EG036301                |
| CLSY3       | <i>V. vinifera</i>     | GSVIVG01013277001             |
| CLSY3       | <i>Z. marina</i>       | Zosma89g01000.1               |
| CLSY3/RMR1  | <i>Z. mays</i>         | GRMZM2G154946                 |
| CLSY5       | <i>B. distachyon</i>   | Bradi3g50300                  |
| CLSY5       | <i>B. distachyon</i>   | Bradi2g26500                  |
| CLSY5       | <i>B. distachyon</i>   | Bradi2g43501                  |
| CLSY5       | <i>B. stacei</i>       | Brast01G217700                |
| CLSY5       | <i>B. stacei</i>       | Brast04G120300                |
| CLSY5       | <i>B. stacei</i>       | Brast08G132400                |
| CLSY5       | <i>O. sativa</i>       | LOC_Os02g43460                |
| CLSY5       | <i>P. hallii</i>       | Pahal.A02764                  |
| CLSY5a      | <i>P. virgatum</i>     | Pavir.Aa01193                 |
| CLSY5b      | <i>P. virgatum</i>     | Pavir.Ab02445                 |
| CLSY5a      | <i>S. angustifolia</i> | STRANG_00083573-RA            |
| CLSY5b      | <i>S. angustifolia</i> | STRANG_00018510-RA            |
| CLSY5c      | <i>S. angustifolia</i> | STRANG_00037404-RA            |
| CLSY5d      | <i>S. angustifolia</i> | STRANG_00042628-RA            |
| CLSY5e      | <i>S. angustifolia</i> | STRANG_00038294-RA            |
| CLSY5       | <i>S. viridis</i>      | Sevir.1G259000                |

CLSY5/RMR1  
-like

*Z. mays*

GRMZM2G178435

| <b>Gene</b>  | <b>Species</b>         | <b>Accession</b>      |
|--------------|------------------------|-----------------------|
| <i>DRD1</i>  | <i>A. comosus</i>      | Aco017413             |
| <i>DRD1</i>  | <i>A. thaliana</i>     | AT2G16390.1           |
| <i>DRD1a</i> | <i>B. distachyon</i>   | Bradi2g21450          |
| <i>DRD1b</i> | <i>B. distachyon</i>   | Bradi3g19890          |
| <i>DRD1L</i> | <i>B. distachyon</i>   | Bradi1g74070          |
| <i>DRD1</i>  | <i>B. stacei</i>       | Brast03G065000        |
| <i>DRD1a</i> | <i>B. stacei</i>       | Brast08G078200        |
| <i>DRD1b</i> | <i>B. stacei</i>       | Brast03G077600        |
| <i>DRD1L</i> | <i>B. stacei</i>       | Brast02G053000        |
| <i>DRD1</i>  | <i>F. vesca</i>        | gene21858-v1.0-hybrid |
| <i>DRD1</i>  | <i>O. sativa</i>       | LOC_Os08g14610        |
| <i>DRD1a</i> | <i>O. sativa</i>       | LOC_Os07g25390        |
| <i>DRD1b</i> | <i>O. sativa</i>       | LOC_Os06g14440        |
| <i>DRD1L</i> | <i>O. sativa</i>       | LOC_Os03g06920        |
| <i>DRD1</i>  | <i>P. hallii</i>       | Pahal.B01415          |
| <i>DRD1L</i> | <i>P. hallii</i>       | Pahal.I00535          |
| <i>DRD1a</i> | <i>P. tricarpha</i>    | Potri.004G159000      |
| <i>DRD1b</i> | <i>P. trichocarpa</i>  | Potri.009G120700      |
| <i>DRD1a</i> | <i>P. virgatum</i>     | Pavir.Bb00923         |
| <i>DRD1b</i> | <i>P. virgatum</i>     | Pavir.J23343          |
| <i>DRD1a</i> | <i>S. angustifolia</i> | STRANG_00017656-RA    |
| <i>DRD1b</i> | <i>S. angustifolia</i> | STRANG_00048730-RA    |
| <i>DRD1c</i> | <i>S. angustifolia</i> | STRANG_00048722-RA    |
| <i>DRD1L</i> | <i>S. angustifolia</i> | STRANG_00017091-RA    |
| <i>DRD1a</i> | <i>S. italica</i>      | Seita.6G109100        |
| <i>DRD1b</i> | <i>S. italica</i>      | Seita.9G302200        |
| <i>DRD1L</i> | <i>S. italica</i>      | Seita.9G529000        |
| <i>DRD1L</i> | <i>S. viridis</i>      | Sevir.9G533600        |
| <i>DRD1</i>  | <i>S. polyrhiza</i>    | Spipo9G0003300        |
| <i>DRD1</i>  | <i>T. cacao</i>        | Thecc1EG006828        |
| <i>DRD1</i>  | <i>V. vinifera</i>     | GSVIVG01024225001     |
| <i>DRD1a</i> | <i>Z. mays</i>         | GRMZM2G574858         |
| <i>DRD1b</i> | <i>Z. mays</i>         | GRMZM2G393742         |



**Sup. Table 2. Reverse transcriptase PCR primers**

| <b>Primer</b> | <b>Sequence</b>                       |
|---------------|---------------------------------------|
| OsE1 F        | GGCAAAGAAACAATCCTGGTAG                |
| OsE1 R        | CTCACTAGTGGTATCAACTGCAGTAGACTGTGT     |
| OsF1 RT F     | GCGAGTTGTGCTTTTACACCAGT               |
| OsF1 R        | CTCACTAGTTTTGAAGTACTTTCTGCAGAATGAATCT |
| OsDE2 RT F    | GAGAAAGGATGACTTTGCCAGAC               |
| OsDE2 RT R    | GGTGATCGAACCTGTCTTAGAGTA              |
| OsF2 RT F     | GGAAGCAAACATGACTTTGCCAG               |
| OsF2 RT R     | CGAGCGAGTCTGTCTTAGAGTAA               |

**Sup. Table 3. NRPE1 and NRPF1 CTD characteristics**

|                                   | length <sup>1</sup> | Ago hooks |
|-----------------------------------|---------------------|-----------|
| <b>NRPE1, Non-Poaceae</b>         |                     |           |
| <i>Ananas comosus</i>             | 431                 | 9         |
| <i>Asparagas officinalis</i>      | 539                 | 8         |
| <i>Elaeis oleifera</i>            | 291                 | 5         |
| <i>Musa acuminata</i>             | 375                 | 6         |
| <i>Phalaenopsis equestris</i>     | 471                 | 8         |
| <i>Phoenix dactylifera</i>        | 313                 | 7         |
| <i>Spirodela polyrhiza</i>        | 246                 | 4         |
| <i>Zostera marina</i>             | 707                 | 23        |
| <b>NRPE1, Poaceae</b>             |                     |           |
| <i>Aegilops tauschii</i>          | 444                 | 15        |
| <i>Brachypodium distachyon</i>    | 513                 | 15        |
| <i>Brachypodium stacei</i>        | 496                 | 15        |
| <i>Eragrostis tef</i>             | 595                 | 14        |
| <i>Oryza sativa</i>               | 541                 | 13        |
| <i>Panicum hallii</i>             | 506                 | 13        |
| <i>Panicum virgatum</i>           | 526                 | 15        |
| <i>Streptochaeta angustifolia</i> | 585                 | 16        |
| <i>Seteria italica</i>            | 541                 | 16        |
| <i>Seteria viridis</i>            | 541                 | 15        |
| <i>Sorghum bicolor</i>            | 538                 | 14        |
| <i>Triticum aestivum</i>          | 468                 | 16        |
| <i>Zea mays</i>                   | 468                 | 9         |
| <b>NRPF1, Poaceae</b>             |                     |           |
| <i>Aegilops tauschii</i>          | 314                 | 5         |
| <i>Brachypodium distachyon</i>    | 265                 | 2         |
| <i>Brachypodium stacei</i>        | 288                 | 2         |
| <i>Hordeum vulgare</i>            | 324                 | 3         |
| <i>Oryza sativa</i>               | 249                 | 0         |
| <i>Panicum virgatum</i>           | 241                 | 2         |
| <i>Streptochaeta angustifolia</i> | 189                 | 1         |
| <i>Seteria italica</i>            | 242                 | 1         |
| <i>Seteria viridis</i>            | 242                 | 1         |
| <i>Sorghum bicolor</i>            | 276                 | 2         |
| <i>Triticum aestivum</i>          | 324                 | 4         |

**Sup. Table 4. Evidence of positive selection following the duplication of *NRPE1*.**

| <i>NRPE1</i>                      | Position <sup>1</sup> | BEB score | Amino acid <sup>1</sup> | Ancestral / F1 amino acid <sup>1</sup> | Surface (S) / Interior (I) | Feature/Structure |
|-----------------------------------|-----------------------|-----------|-------------------------|----------------------------------------|----------------------------|-------------------|
| High confidence (sites on branch) | 513                   | 0.66      | M                       | F/Y                                    | Surface                    | Pore              |
| Lower confidence (sites in clade) | 1049                  | 0.990**   | G                       | P                                      | Interior                   | Jaw               |

| <i>NRPF1</i>                      | Position <sup>1</sup> | BEB score | Amino acid <sup>1</sup> | Ancestral / E1 amino acid <sup>1</sup> | Surface (S) / Interior (I) | Structure / Feature in template model       |
|-----------------------------------|-----------------------|-----------|-------------------------|----------------------------------------|----------------------------|---------------------------------------------|
| High confidence (sites on branch) | 539                   | 0.878     | K                       | P                                      | Surface                    | Pore / Near RBP 8 surface                   |
|                                   | 503                   | 0.873     | K                       | V/G                                    | Surface                    | Pore                                        |
|                                   | 742                   | 0.845     | K                       | V/A                                    | Surface                    | Funnel-Bridge helix / RBP2 interaction site |
|                                   | 304                   | 0.823     | F                       | E/D                                    | Surface                    | Clamp-Rudder                                |
|                                   | 349                   | 0.768     | E                       | S                                      | Surface                    | Active site pocket                          |
|                                   | 1184                  | 0.734     | A                       | C                                      | Surface                    | Clamp                                       |
|                                   | 223                   | 0.609     | S                       | Q/K                                    | Surface                    | Clamp / RPB2 interaction site               |
|                                   | 825                   | 0.597     | I                       | N                                      | Surface                    | Foot                                        |
|                                   | 1034                  | 0.59      | A                       | K                                      | Surface                    | Cleft                                       |
|                                   | 899                   | 0.554     | H                       | S/P                                    | Surface                    | Jaw / Near RPB2 surface                     |
|                                   | 367                   | 0.534     | A                       | K/N                                    | Surface                    | Dock                                        |
| Lower confidence (sites in clade) | 226                   | 0.985*    | C                       | P                                      | Surface                    | Clamp / Near RPB2 surface                   |
|                                   | 234                   | 0.998**   | V                       | V/I                                    | Surface                    | Clamp                                       |
|                                   | 235                   | 0.991**   | S                       | P                                      | Surface                    | Clamp-Lid                                   |
|                                   | 237                   | 0.980*    | V                       | I/F                                    | Surface                    | Clamp-Lid                                   |
|                                   | 240                   | 0.999**   | G                       | G                                      | Surface                    | Clamp-Lid / Near RPB2 surface               |
|                                   | 243                   | 0.976*    | F                       | I                                      | Surface                    | Clamp-Lid                                   |
|                                   | 244                   | 0.955*    | S                       | M                                      | Surface                    | Clamp-Lid                                   |
|                                   | 254                   | 0.966*    | R                       | K                                      | Surface                    | Clamp                                       |
|                                   | 259                   | 0.976*    | K                       | K                                      | Surface                    | Clamp                                       |
|                                   | 270                   | 0.972*    | S                       | S                                      | Surface                    | Clamp                                       |
|                                   | 301                   | 0.984*    | D                       | D                                      | Surface                    | Clamp-Rudder / Near RPB2 surface            |
|                                   | 309                   | 0.954*    | T                       | S                                      | Surface                    | Clamp-Rudder                                |
|                                   | 319                   | 0.995**   | T                       | T                                      | Surface                    | Clamp                                       |

|  |      |         |   |      |          |                                         |
|--|------|---------|---|------|----------|-----------------------------------------|
|  | 341  | 0.976*  | G | G    | Surface  | Active site pocket                      |
|  | 360  | 0.999** | K | Q/R  | Surface  | Dock                                    |
|  | 368  | 0.980*  | Q | R    | Surface  | Dock                                    |
|  | 371  | 0.994** | D | E    | Surface  | Dock                                    |
|  | 382  | 0.991** | T | R/K  | Surface  | Dock                                    |
|  | 395  | 0.987*  | K | ---- | Surface  | Dock / Indel relative to NRPE1          |
|  | 396  | 0.996** | D | ---- | Surface  | Dock / Indel relative to NRPE1          |
|  | 399  | 0.977*  | N | S    | Surface  | Dock / Near Rbp2 surface                |
|  | 402  | 0.995** | H | H/Y  | Surface  | Dock                                    |
|  | 420  | 0.991** | I | I/V  | Surface  | Active site pocket                      |
|  | 440  | 0.987*  | Q | Y    | Surface  | Active site pocket                      |
|  | 496  | 0.974*  | G | G    | Interior | Pore                                    |
|  | 521  | 0.969*  | R | K    | Surface  | Pore                                    |
|  | 532  | 0.957*  | S | V/L  | Interior | Pore                                    |
|  | 556  | 0.992** | T | A    | Interior | Pore                                    |
|  | 557  | 0.993** | K | L    | Surface  | Pore                                    |
|  | 558  | 0.998** | S | P    | Surface  | Pore                                    |
|  | 678  | 0.999** | P | L    | Surface  | Funnel                                  |
|  | 696  | 0.993** | L | F    | Surface  | Funnel / Near RPB2 surface              |
|  | 718  | 0.989*  | T | L    | Surface  | Funnel / Near RPB2 surface              |
|  | 739  | 0.966*  | E | S/T  | Surface  | Funnel-Bridge helix / Near RPB2 surface |
|  | 755  | 0.976*  | S | T    | Surface  | Funnel-Bridge helix / Near RPB2 surface |
|  | 843  | 0.983*  | A | N    | Surface  | Cleft / Near RPB5 surface               |
|  | 861  | 0.999** | N | K    | Surface  | Cleft                                   |
|  | 862  | 0.973*  | E | K    | Surface  | Cleft                                   |
|  | 889  | 0.961*  | K | E    | Surface  | Jaw                                     |
|  | 921  | 0.993** | S | E/D  | Surface  | Jaw                                     |
|  | 929  | 1.000** | T | V    | Surface  | Jaw                                     |
|  | 940  | 0.999** | M | L    | Interior | Jaw                                     |
|  | 949  | 0.977*  | F | L/F  | Surface  | Jaw                                     |
|  | 977  | 0.963*  | G | D/E  | Surface  | Jaw                                     |
|  | 987  | 0.964*  | T | L/V  | Surface  | Jaw / Near RPB9 surface                 |
|  | 988  | 0.985*  | E | E    | Surface  | Jaw / Near RPB9 surface                 |
|  | 993  | 0.987*  | F | I/V  | Surface  | Jaw / Near RPB9 surface                 |
|  | 1025 | 0.991** | S | A    | Surface  | Cleft / Near RPB9 surface               |
|  | 1054 | 0.978*  | S | N    | Interior | Cleft                                   |
|  | 1057 | 0.989*  | A | A    | Interior | Cleft                                   |
|  | 1078 | 0.991** | M | I    | Surface  | Cleft / Near RPB5 surface               |
|  | 1087 | 0.957*  | Q | E/D  | Surface  | Cleft / Near RPB5 surface               |
|  | 1093 | 0.999** | S | C    | Surface  | Cleft / Near RPB5 surface               |
|  | 1099 | 0.998** | T | V    | Surface  | Cleft                                   |

|  |      |         |   |   |         |                           |
|--|------|---------|---|---|---------|---------------------------|
|  | 1128 | 0.965*  | Q | K | Surface | Cleft / Near RPB5 surface |
|  | 1174 | 0.954*  | I | M | Surface | Clamp / Near RPB5 surface |
|  | 1201 | 0.999** | N | H | Surface | Clamp                     |
|  |      |         |   |   |         |                           |

<sup>1</sup> Relative to *O. sativa* paralogs

Sup. Table 5. Evidence of positive selection following the duplication of *NRPD/E2*.

| <i>NRPF2</i>                      | Position <sup>1</sup> | BEB score | Amino acid <sup>1</sup> | Ancestral / D2/E2 amino acid <sup>1</sup> | Surface (S) / Interior (I)              | Feature/Structure                 |
|-----------------------------------|-----------------------|-----------|-------------------------|-------------------------------------------|-----------------------------------------|-----------------------------------|
| High confidence (sites on branch) | 747                   | 0.989*    | M                       | Y                                         | Surface                                 | Rbp2 domain 6 / Near RBP1 surface |
|                                   | 614                   | 0.902     | E                       | S                                         | Surface                                 | Rbp2 domain 4 / Near RPB9 surface |
|                                   | 299                   | 0.864     | G                       | Y                                         | Surface                                 | Rbp2 domain 2                     |
|                                   | 741                   | 0.853     | T                       | F                                         | Surface                                 | Rbp2 domain 6                     |
|                                   | 682                   | 0.815     | N                       | E                                         | Surface                                 | Rbp2 domain 5                     |
|                                   | 139                   | 0.568     | V                       | S                                         | Surface                                 | Protrusion                        |
|                                   | 383                   | 0.51      | M                       | L                                         | Interior                                | Rbp2 domain 2                     |
|                                   |                       |           |                         |                                           |                                         |                                   |
| Lower confidence (sites in clade) | 75                    | 0.951*    | R                       | N/D                                       | Surface                                 | Protrusion                        |
|                                   | 99                    | 0.998**   | F                       | F                                         | Interior                                | Protrusion                        |
|                                   | 102                   | 0.988*    | L                       | L                                         | Interior                                | Protrusion                        |
|                                   | 105                   | 0.964*    | V                       | V                                         | Interior                                | Protrusion                        |
|                                   | 133                   | 0.951*    | E                       | E                                         | Surface                                 | Protrusion                        |
|                                   | 138                   | 0.984*    | W                       | W                                         | Surface                                 | Protrusion                        |
|                                   | 146                   | 0.975*    | V                       | E                                         | Surface                                 | Protrusion                        |
|                                   | 208                   | 0.967*    | K                       | R                                         | Surface                                 | Protrusion                        |
|                                   | 223                   | 0.959*    | L                       | L                                         | Surface                                 | Protrusion                        |
|                                   | 227                   | 0.998**   | E                       | D                                         | Interior                                | Protrusion                        |
|                                   | 261                   | 0.997**   | S                       | K/R                                       | Surface                                 | Rbp2 domain 2                     |
|                                   | 274                   | 0.990**   | R                       | K                                         | Surface                                 | Rbp2 domain 2                     |
|                                   | 279                   | 0.972*    | S                       | Y                                         | Surface                                 | Rbp2 domain 2                     |
|                                   | 283                   | 0.990**   | Q                       | E/D                                       | Interior                                | Rbp2 domain 2                     |
|                                   | 441                   | 1.000**   | M                       | R                                         | Surface                                 |                                   |
|                                   | 442                   | 1.000**   | H                       | H                                         | Surface                                 |                                   |
|                                   | 444                   | 1.000**   | Q                       | E                                         | Surface                                 |                                   |
|                                   | 457                   | 0.998**   | G                       | G/S                                       | Surface                                 |                                   |
|                                   | 473                   | 0.997**   | V                       | I/V                                       | Interior                                |                                   |
|                                   | 515                   | 0.989*    | M                       | L                                         | Interior                                | Rbp2 domain 3                     |
| 522                               | 0.999**               | V         | V                       | Surface                                   | Rbp2 domain 3                           |                                   |
| 525                               | 0.999**               | A         | A                       | Surface                                   | Rbp2 domain 3                           |                                   |
| 527                               | 0.999**               | K         | K                       | Surface                                   | Rbp2 domain 3 / Near RPB1 surface       |                                   |
| 599                               | 1.000**               | L         | P                       | Surface                                   |                                         |                                   |
| 611                               | 0.999**               | D         | D                       | Surface                                   | Rbp2 domain 4 / Near RPB9 surface       |                                   |
| 639                               | 0.989*                | Q         | H                       | Surface                                   | Rbp2 domain 4 / Near RPB1+RPB9 surfaces |                                   |
| 658                               | 0.972*                | I         | I/V                     | Surface                                   | Rbp2 domain 4                           |                                   |

|  |      |         |   |   |          |                                                 |
|--|------|---------|---|---|----------|-------------------------------------------------|
|  | 664  | 0.996** | N | K | Surface  |                                                 |
|  | 670  | 0.998** | N | G | Surface  |                                                 |
|  | 699  | 1.000** | Y | W | Surface  | Rbp2 domain 5 / Near RBP1 surface               |
|  | 743  | 0.999** | K | R | Surface  | Rbp2 domain 6 / Near RBP1 surface               |
|  | 752  | 0.998** | I | H | Interior | Rbp2 domain 6                                   |
|  | 761  | 0.986*  | T | T | Surface  | Rbp2 domain 6                                   |
|  | 775  | 0.974*  | L | L | Surface  | Rbp2 domain 6                                   |
|  | 800  | 0.952*  | S | R | Surface  | Rbp2 domain 6                                   |
|  | 819  | 0.993** | I | V | Surface  | Rbp2 domain 6 / Near RBP1 surface               |
|  | 833  | 0.991** | L | M | Interior | Rbp2 domain 6                                   |
|  | 846  | 0.998** | Q | E | Surface  | Rbp2 domain 6                                   |
|  | 871  | 0.989*  | N | D | Surface  | Rbp2 domain 6                                   |
|  | 887  | 0.998** | I | D | Surface  | Rbp2 domain 6                                   |
|  | 916  | 0.997** | I | I | Surface  | Rbp2 domain 6                                   |
|  | 927  | 0.954*  | E | Q | Surface  | Rbp2 domain 6                                   |
|  | 938  | 0.999** | T | K | Surface  | Rbp2 domain 6                                   |
|  | 942  | 0.959*  | F | V | Interior | Rbp2 domain 6                                   |
|  | 948  | 0.989*  | T | V | Surface  | Rbp2 domain 6                                   |
|  | 1073 | 1.000** | H | I | Surface  | Rbp2 domain 6                                   |
|  | 1134 | 0.998** | V | F | Surface  | Rbp2 domain 7 – Zinc finger / Near RBP1 surface |
|  | 1154 | 1.000** | R | R | Surface  | Rbp2 domain 7 – Zinc finger                     |
|  | 1177 | 1.000** | R | N | Surface  | Rbp2 domain 7 – Zinc finger / Near RBP1 surface |
|  | 1181 | 0.992** | V | I | Surface  | Rbp2 domain 7 / Near RBP1 surface               |
|  | 1196 | 1.000** | S | S | Surface  | Rbp2 domain 7 / Near RBP1 surface               |
|  | 1207 | 0.984*  | L | V | Surface  | Rbp2 domain 7 / Near RBP1 surface               |

<sup>1</sup> Relative to *O. sativa* paralog
